# Supplementary material for: Scandium carbides/cyanides in the boron cage: computational prediction of X@B80(X = Sc2C2, Sc3C2, Sc3CN and Sc3C2CN)
Source: Royal Society of Chemistry journal article supplement (doi:10.1039/c6cp02884e), 2016-01-01
Supplement: c6cp02884e1.pdf [file c6cp02884e1.pdf]

**Electronic supplementary information**

**Scandium Carbides/Cyanides in Boron Cage: Computational  
Prediction of X@B<sub>80</sub> (X = Sc<sub>2</sub>C<sub>2</sub>, Sc<sub>3</sub>C<sub>2</sub>, Sc<sub>3</sub>CN and Sc<sub>3</sub>C<sub>2</sub>CN)**

Peng Jin,<sup>a,\*</sup> Chang Liu,<sup>a</sup> Qinghua Hou,<sup>a</sup> Lanlan Li,<sup>a</sup> Chengchun Tang<sup>a</sup> and Zhongfang

Chen<sup>b,\*</sup>

<sup>a</sup> School of Materials Science and Engineering, Hebei University of Technology, Tianjin 300130, P. R. China

<sup>b</sup> Department of Chemistry, Institute for Functional Nanomaterials, University of Puerto Rico, San Juan, PR 00931, USA

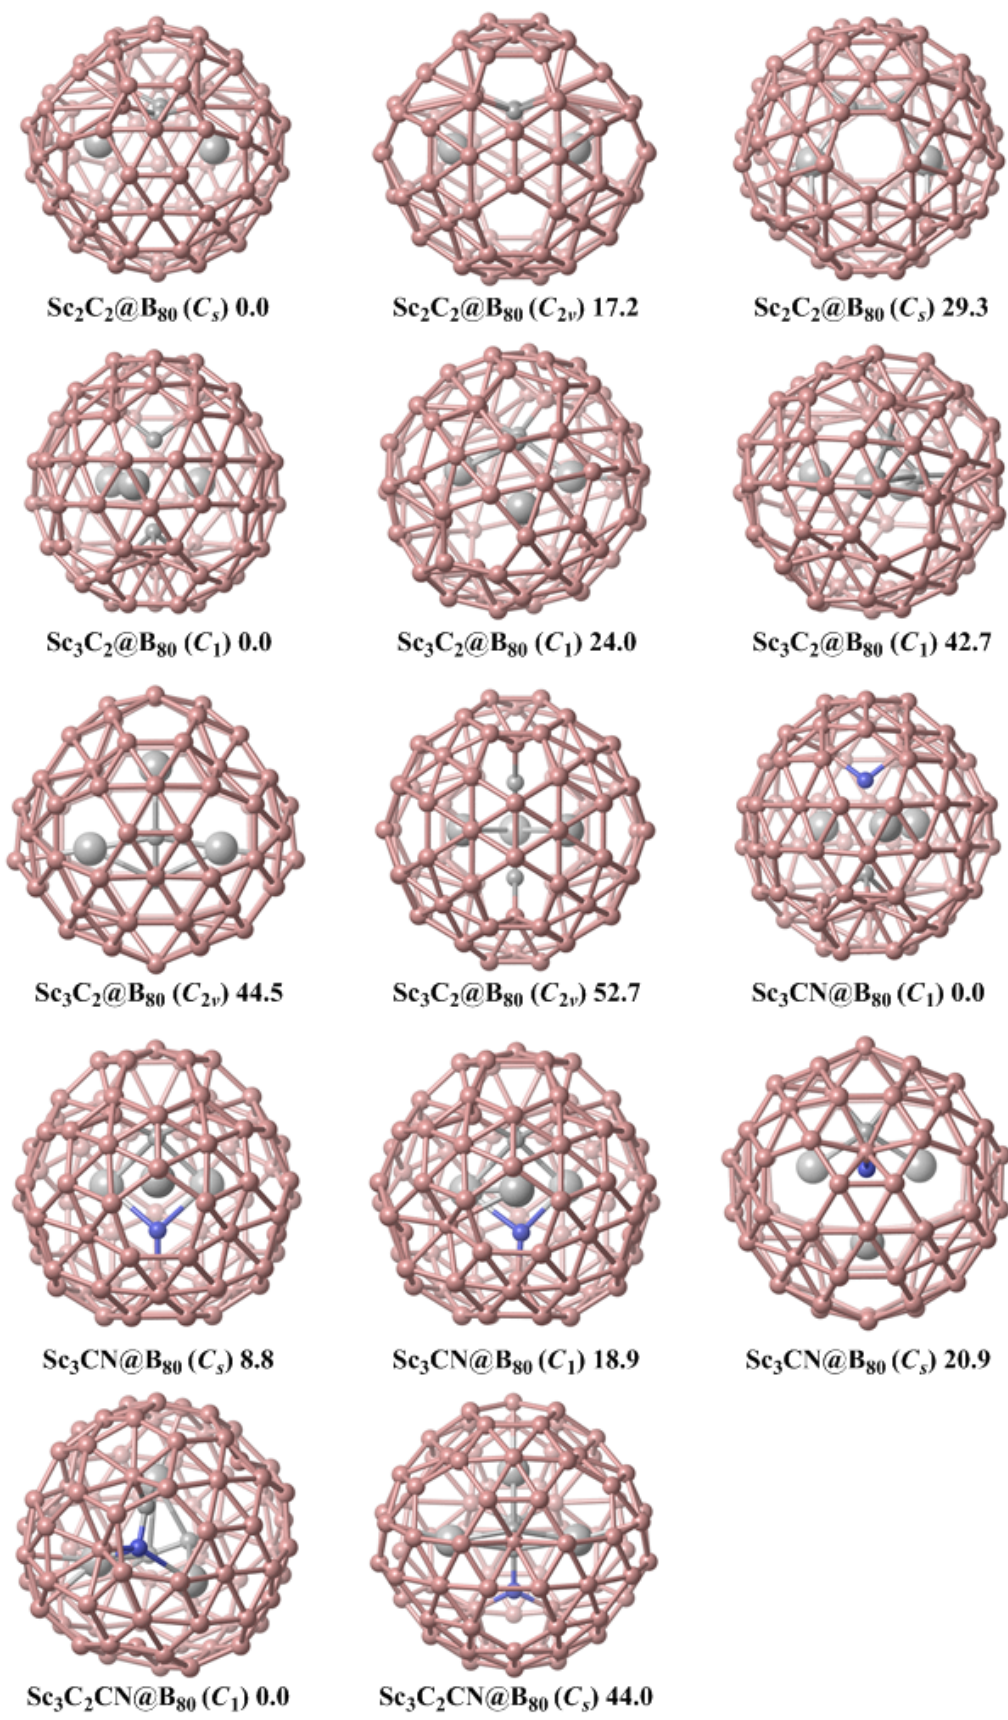

**Fig. S1** Some low-energy isomers (with relative energies in kcal/mol, PBE/6-31G\*~LanL2DZ level) of X@B<sub>80</sub>.

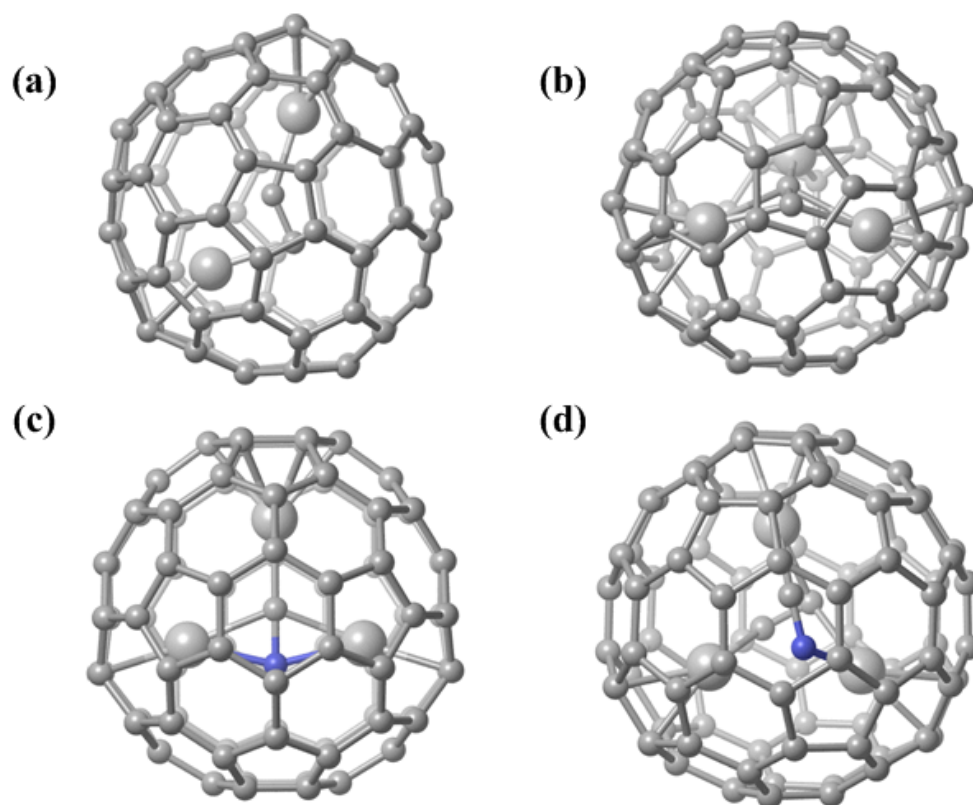

**Fig. S2** Optimized structures of (a)  $\text{Sc}_2\text{C}_2@C_{2v}(5)\text{-C}_{80}$ , (b)  $\text{Sc}_3\text{C}_2@I_h(7)\text{-C}_{80}$ , (c)  $\text{Sc}_3\text{CN}@I_h(7)\text{-C}_{80}$  and (d)  $\text{Sc}_3\text{C}_2\text{CN}@I_h(7)\text{-C}_{80}$ .

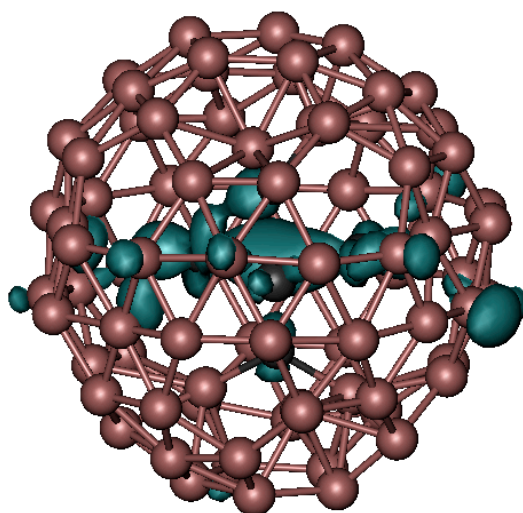

**Fig. S3** Spin density distribution of  $\text{Sc}_3\text{C}_2@B_{80}$  (isovalue: 0.002 a.u.).

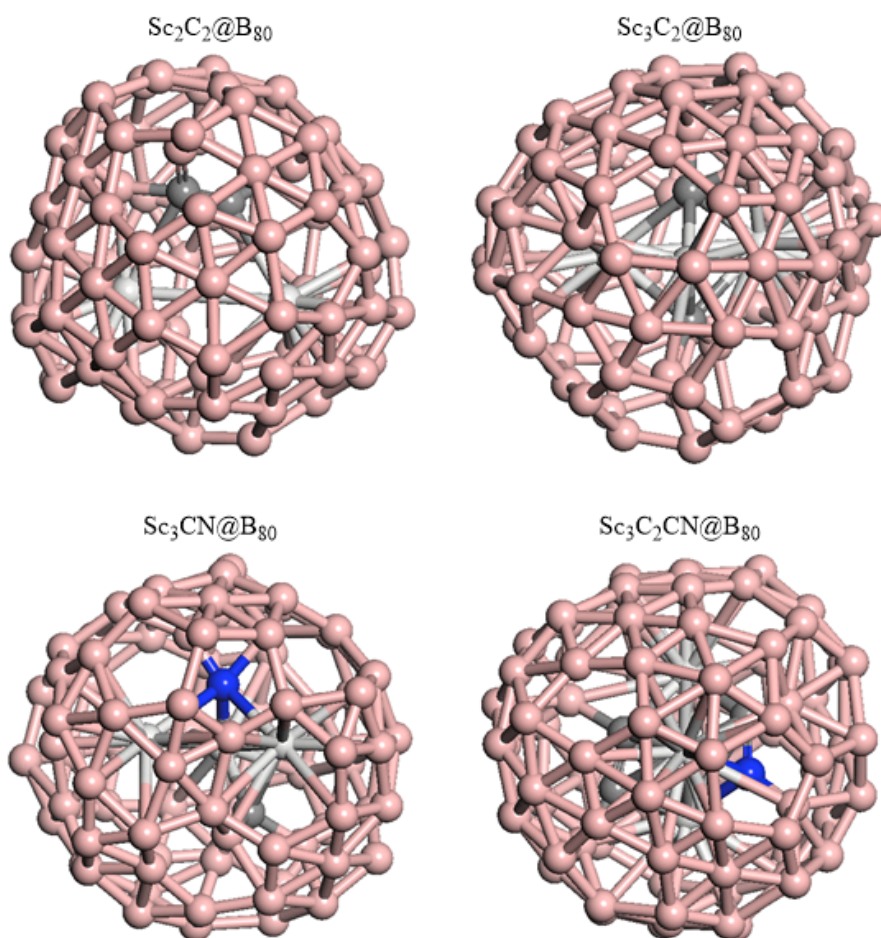

**Fig. S4** The structures of  $X@B_{80}$  after 3 ps BO-MD simulations at 800 K.

**Table S1** Calculated  $^{11}\text{B}$  NMR Chemical Shifts ( $\delta$ : chemical shifts in ppm; M: intensity)

| $B_{80}$ |    | $\text{Sc}_2\text{C}_2@B_{80}$ |   | $[\text{Sc}_3\text{C}_2@B_{80}]^-$ |   | $\text{Sc}_3\text{CN}@B_{80}$ |   | $\text{Sc}_3\text{C}_2\text{CN}@B_{80}$ |   |
|----------|----|--------------------------------|---|------------------------------------|---|-------------------------------|---|-----------------------------------------|---|
| $\delta$ | M  | $\delta$                       | M | $\delta$                           | M | $\delta$                      | M | $\delta$                                | M |
| 15.0     | 12 | 43.3                           | 2 | 72.4                               | 1 | 74.0                          | 1 | 80.7                                    | 1 |
| 13.9     | 24 | 40.3                           | 2 | 71.3                               | 1 | 58.6                          | 1 | 56.1                                    | 1 |
| 13.4     | 24 | 31.9                           | 2 | 43.9                               | 1 | 50.8                          | 1 | 52.4                                    | 1 |
| 11.9     | 8  | 31.5                           | 2 | 42.0                               | 1 | 48.6                          | 1 | 48.7                                    | 1 |
| -0.7     | 12 | 29.2                           | 2 | 34.9                               | 1 | 39.4                          | 1 | 39.6                                    | 1 |
|          |    | 28.0                           | 2 | 33.3                               | 1 | 38.4                          | 1 | 36.1                                    | 1 |
|          |    | 27.1                           | 1 | 31.7                               | 1 | 38.0                          | 1 | 35.5                                    | 1 |
|          |    | 27.0                           | 2 | 31.3                               | 1 | 32.1                          | 2 | 33.9                                    | 1 |

|      |   |      |   |      |   |      |   |
|------|---|------|---|------|---|------|---|
| 26.9 | 2 | 30.5 | 1 | 31.7 | 1 | 33.3 | 1 |
| 26.2 | 2 | 29.9 | 1 | 28.7 | 1 | 30.0 | 2 |
| 22.5 | 2 | 27.9 | 1 | 28.6 | 1 | 28.9 | 1 |
| 20.9 | 2 | 27.3 | 1 | 26.9 | 1 | 25.2 | 1 |
| 20.8 | 2 | 24.9 | 1 | 26.4 | 1 | 24.3 | 1 |
| 19.9 | 2 | 24.2 | 1 | 25.9 | 1 | 23.2 | 1 |
| 19.8 | 2 | 23.5 | 1 | 24.5 | 1 | 22.8 | 1 |
| 17.7 | 2 | 23.5 | 1 | 24.2 | 1 | 22.0 | 1 |
| 17.2 | 3 | 23.3 | 2 | 23.0 | 1 | 21.9 | 1 |
| 16.9 | 2 | 22.3 | 1 | 22.4 | 1 | 21.8 | 1 |
| 16.7 | 2 | 21.6 | 1 | 22.0 | 1 | 21.6 | 1 |
| 15.4 | 2 | 20.9 | 1 | 21.3 | 1 | 21.4 | 2 |
| 14.9 | 2 | 19.3 | 1 | 20.5 | 1 | 21.2 | 1 |
| 14.0 | 2 | 18.3 | 1 | 20.3 | 1 | 20.1 | 1 |
| 12.0 | 2 | 17.5 | 1 | 18.8 | 1 | 19.9 | 1 |
| 11.6 | 2 | 16.5 | 1 | 18.6 | 1 | 19.3 | 1 |
| 9.8  | 2 | 16.4 | 1 | 18.0 | 1 | 19.1 | 2 |
| 8.8  | 2 | 15.9 | 1 | 17.9 | 1 | 17.5 | 1 |
| 8.2  | 2 | 15.5 | 1 | 16.8 | 1 | 17.1 | 1 |
| 8.0  | 2 | 14.1 | 1 | 16.1 | 1 | 16.8 | 1 |
| 7.0  | 2 | 13.9 | 3 | 15.2 | 1 | 16.2 | 1 |
| 4.1  | 2 | 13.7 | 1 | 14.9 | 2 | 16.1 | 2 |
| 3.6  | 4 | 13.4 | 1 | 14.3 | 1 | 15.5 | 1 |
| 1.4  | 2 | 13.0 | 1 | 14.2 | 1 | 15.4 | 1 |
| 1.3  | 2 | 12.6 | 1 | 13.5 | 1 | 14.9 | 1 |
| 0.8  | 1 | 12.4 | 1 | 13.4 | 1 | 14.7 | 1 |
| 0.0  | 2 | 11.3 | 3 | 12.4 | 1 | 14.2 | 1 |

|       |   |      |   |      |   |      |   |
|-------|---|------|---|------|---|------|---|
| -1.6  | 2 | 11.0 | 1 | 12.0 | 1 | 12.7 | 1 |
| -4.0  | 2 | 10.9 | 2 | 11.1 | 1 | 12.6 | 1 |
| -10.7 | 1 | 10.1 | 1 | 10.9 | 2 | 12.0 | 1 |
| -12.4 | 1 | 10.0 | 1 | 10.4 | 1 | 11.4 | 1 |
| -13.9 | 1 | 9.3  | 1 | 9.9  | 1 | 11.1 | 1 |
| -14.2 | 1 | 9.1  | 1 | 9.3  | 1 | 10.7 | 1 |
| -14.4 | 1 | 8.7  | 1 | 9.1  | 3 | 10.4 | 1 |
|       |   | 8.6  | 1 | 9.0  | 1 | 10.1 | 1 |
|       |   | 8.2  | 1 | 8.2  | 1 | 9.8  | 1 |
|       |   | 7.1  | 1 | 7.1  | 1 | 9.7  | 1 |
|       |   | 6.4  | 2 | 6.7  | 1 | 8.7  | 1 |
|       |   | 6.3  | 1 | 6.3  | 1 | 7.8  | 1 |
|       |   | 5.9  | 1 | 6.1  | 1 | 7.6  | 1 |
|       |   | 5.5  | 1 | 5.6  | 1 | 7.0  | 1 |
|       |   | 5.4  | 1 | 5.5  | 3 | 6.5  | 1 |
|       |   | 5.2  | 1 | 5.4  | 1 | 6.4  | 1 |
|       |   | 5.0  | 2 | 4.9  | 1 | 6.3  | 1 |
|       |   | 4.5  | 1 | 4.8  | 1 | 6.0  | 1 |
|       |   | 4.1  | 1 | 4.7  | 1 | 5.4  | 1 |
|       |   | 3.8  | 1 | 4.1  | 1 | 5.3  | 1 |
|       |   | 3.8  | 1 | 3.9  | 2 | 5.0  | 1 |
|       |   | 3.6  | 1 | 3.8  | 1 | 4.7  | 1 |
|       |   | 3.2  | 1 | 3.6  | 1 | 4.1  | 1 |
|       |   | 3.1  | 1 | 3.5  | 1 | 3.1  | 1 |
|       |   | 2.3  | 1 | 3.2  | 1 | 1.6  | 1 |
|       |   | 1.5  | 1 | 2.6  | 1 | 0.8  | 1 |
|       |   | 0.7  | 1 | 1.9  | 1 | 0.7  | 1 |

|       |   |       |   |       |   |
|-------|---|-------|---|-------|---|
| 0.6   | 1 | 1.5   | 1 | 0.3   | 1 |
| -0.1  | 1 | 1.2   | 1 | -0.3  | 1 |
| -3.2  | 1 | -1.0  | 1 | -1.2  | 1 |
| -4.7  | 1 | -1.4  | 1 | -1.5  | 2 |
| -7.2  | 1 | -2.9  | 1 | -1.6  | 1 |
| -9.8  | 1 | -4.2  | 1 | -2.3  | 1 |
| -12.0 | 1 | -4.6  | 1 | -3.5  | 1 |
| -12.6 | 1 | -8.2  | 1 | -5.4  | 1 |
| -18.1 | 1 | -9.3  | 1 | -6.0  | 1 |
| -18.9 | 1 | -33.7 | 1 | -6.6  | 1 |
|       |   |       |   | -9.7  | 1 |
|       |   |       |   | -10.4 | 1 |
|       |   |       |   | -16.8 | 1 |

**Optimized Cartesian coordinates (PBE/6-31G\*~LanL2DZ level)**

**Sc<sub>2</sub>C<sub>2</sub>@B<sub>80</sub>(C<sub>s</sub>)**

|   |             |             |             |   |             |             |             |
|---|-------------|-------------|-------------|---|-------------|-------------|-------------|
| B | -2.84733600 | 0.72766600  | 3.13682500  | B | 1.12715200  | -4.19776000 | 0.00000000  |
| B | -2.76169200 | -1.04497000 | 3.14844800  | B | 3.31998400  | -2.60545700 | 0.86852900  |
| B | -3.55147000 | -1.59099200 | 1.74796500  | B | 1.93410900  | -3.52984300 | 1.34845300  |
| B | -3.66410300 | 1.19868100  | 1.73823100  | B | 4.22522400  | 0.21915000  | 0.85268400  |
| B | -4.13051900 | -0.20620200 | 0.83942800  | B | 3.75071300  | -1.20012500 | 1.71238300  |
| B | -1.47316700 | 1.61052200  | 3.44580700  | B | 2.85255800  | -0.71117700 | 3.11329000  |
| B | -0.98520800 | 2.98766400  | 2.63234700  | B | 3.61990700  | 1.58482200  | 1.71288000  |
| B | 0.72957200  | 3.10486500  | 2.67566300  | B | 2.76180500  | 1.01154500  | 3.11245200  |
| B | -0.02617700 | 0.83689600  | 4.08076300  | B | 1.34566800  | 1.78942900  | -3.60971800 |
| B | 1.34566800  | 1.78942900  | 3.60971800  | B | 0.72957200  | 3.10486500  | -2.67566300 |
| B | -1.31730900 | -1.75748900 | 3.50213600  | B | -0.98520800 | 2.98766400  | -2.63234700 |
| B | 0.05741600  | -0.82486300 | 4.08685300  | B | -0.02617700 | 0.83689600  | -4.08076300 |
| B | 1.51949200  | -1.62869400 | 3.61339700  | B | -1.47316700 | 1.61052200  | -3.44580700 |
| B | -0.67919900 | -3.01163600 | 2.62370500  | B | 3.05028800  | 2.93165400  | -0.86340600 |
| B | 1.03677800  | -2.99489700 | 2.67841000  | B | 3.05028800  | 2.93165400  | 0.86340600  |
| B | -2.84925600 | -2.82067000 | 0.89025100  | B | 1.55930900  | 3.69856100  | 1.32679900  |
| B | -1.49269600 | -3.68771600 | 1.32546100  | B | 1.55930900  | 3.69856100  | -1.32679900 |
| B | -0.58000200 | -4.33664400 | 0.00000000  | B | 0.70431000  | 4.31289200  | 0.00000000  |
| B | -2.84925600 | -2.82067000 | -0.89025100 | B | 2.15919700  | 2.36067500  | -2.21233400 |

|   |             |             |             |    |             |             |             |
|---|-------------|-------------|-------------|----|-------------|-------------|-------------|
| B | -1.49269600 | -3.68771600 | -1.32546100 | B  | -0.21762600 | 3.94807300  | -1.46620000 |
| B | -2.94950400 | 2.45357300  | 0.88445300  | B  | -1.88381800 | 1.05215400  | -1.63462300 |
| B | -2.94950400 | 2.45357300  | -0.88445300 | B  | -1.48166200 | -0.06817300 | -3.79819200 |
| B | -1.85693700 | 3.63483200  | -1.34582600 | B  | -1.72227700 | -1.47294800 | -1.66216700 |
| B | -1.85693700 | 3.63483200  | 1.34582600  | B  | 0.18226500  | -3.91505200 | -1.46678100 |
| B | -1.02661800 | 4.35404800  | 0.00000000  | B  | 0.18226500  | -3.91505200 | 1.46678100  |
| B | -4.13051900 | -0.20620200 | -0.83942800 | B  | -1.72227700 | -1.47294800 | 1.66216700  |
| B | -3.55147000 | -1.59099200 | -1.74796500 | B  | -1.48166200 | -0.06817300 | 3.79819200  |
| B | -2.76169200 | -1.04497000 | -3.14844800 | B  | 1.38661500  | 0.08048300  | 3.59919300  |
| B | -3.66410300 | 1.19868100  | -1.73823100 | B  | 2.34265500  | -2.07386400 | 2.17400400  |
| B | -2.84733600 | 0.72766600  | -3.13682500 | B  | 3.77731200  | -1.18690200 | 0.00000000  |
| B | 2.85255800  | -0.71117700 | -3.11329000 | B  | 3.57412200  | 1.54978900  | 0.00000000  |
| B | 3.75071300  | -1.20012500 | -1.71238300 | B  | 2.15919700  | 2.36067500  | 2.21233400  |
| B | 4.22522400  | 0.21915000  | -0.85268400 | B  | -0.21762600 | 3.94807300  | 1.46620000  |
| B | 2.76180500  | 1.01154500  | -3.11245200 | B  | -3.89370600 | 1.29471400  | 0.00000000  |
| B | 3.61990700  | 1.58482200  | -1.71288000 | B  | -3.79518700 | -1.68674900 | 0.00000000  |
| B | 1.51949200  | -1.62869400 | -3.61339700 | B  | 2.34265500  | -2.07386400 | -2.17400400 |
| B | 0.05741600  | -0.82486300 | -4.08685300 | B  | 1.38661500  | 0.08048300  | -3.59919300 |
| B | -1.31730900 | -1.75748900 | -3.50213600 | B  | -1.88381800 | 1.05215400  | 1.63462300  |
| B | 1.03677800  | -2.99489700 | -2.67841000 | Sc | 0.14132300  | -1.95383700 | 0.00000000  |
| B | -0.67919900 | -3.01163600 | -2.62370500 | Sc | -0.29090600 | 1.98581900  | 0.00000000  |
| B | 3.31998400  | -2.60545700 | -0.86852900 | C  | -1.31097700 | -0.17111100 | 0.73011700  |
| B | 1.93410900  | -3.52984300 | -1.34845300 | C  | -1.31097700 | -0.17111100 | -0.73011700 |

### Sc<sub>3</sub>C<sub>2</sub>@B<sub>80</sub>(C<sub>1</sub>)

|   |             |             |             |   |             |             |             |
|---|-------------|-------------|-------------|---|-------------|-------------|-------------|
| B | 2.97040300  | -0.84323000 | 3.01069800  | B | -3.28182400 | 2.49409100  | 1.13927900  |
| B | 2.88915300  | 0.84665600  | 3.12283700  | B | -1.93131800 | 3.44078900  | 1.71832000  |
| B | 3.72114400  | 1.60000300  | 1.75337300  | B | -4.26535800 | -0.29472800 | 0.96601000  |
| B | 3.88812600  | -1.28689200 | 1.55512100  | B | -3.74828000 | 1.07057200  | 1.91319100  |
| B | 4.33671700  | 0.24560400  | 0.83743100  | B | -2.76107900 | 0.46426400  | 3.20195700  |
| B | 1.60927000  | -1.71445300 | 3.39937500  | B | -3.50380300 | -1.65380200 | 1.70899500  |
| B | 1.11435300  | -3.08991100 | 2.47052000  | B | -2.66802700 | -1.23798100 | 3.14978600  |
| B | -0.59129900 | -3.28720300 | 2.57742100  | B | -1.46347100 | -1.51723300 | -3.63568900 |
| B | 0.16992300  | -1.15541900 | 4.02142300  | B | -0.71714500 | -2.87531800 | -3.00270500 |
| B | -1.24131400 | -2.06123600 | 3.58818100  | B | 1.02383300  | -2.90750500 | -3.08331500 |
| B | 1.42080100  | 1.45711300  | 3.58449000  | B | -0.12382900 | -0.53410500 | -4.18617300 |
| B | 0.11586600  | 0.51096100  | 3.93485300  | B | 1.34598700  | -1.37403900 | -3.76225200 |
| B | -1.38985600 | 1.34654800  | 3.67179000  | B | -2.91050300 | -2.70790500 | -1.01509000 |
| B | 0.74718900  | 2.90473100  | 2.92642400  | B | -2.83736000 | -2.84398100 | 0.72041400  |
| B | -1.00645700 | 2.86808700  | 3.02636200  | B | -1.41542000 | -3.69578200 | 1.15144300  |
| B | 3.03337000  | 2.92636100  | 1.01840200  | B | -1.45875100 | -3.29531200 | -1.57318500 |
| B | 1.53137200  | 3.63234800  | 1.63725900  | B | -0.56008500 | -3.99975200 | -0.27518100 |
| B | 0.59719600  | 4.21549000  | 0.29815800  | B | -1.81721100 | -1.23879900 | -1.64686700 |
| B | 2.84755100  | 3.09164700  | -0.64456800 | B | 0.17352900  | -3.72383800 | -1.81226900 |



|   |             |             |             |    |             |             |             |
|---|-------------|-------------|-------------|----|-------------|-------------|-------------|
| B | 1.42702700  | 3.93957400  | -1.16476400 | B  | 2.50881700  | -2.08558600 | -2.58314600 |
| B | 3.37252000  | -2.56764200 | 0.61557500  | B  | 1.07436200  | 0.32032300  | -3.35643100 |
| B | 3.22382200  | -2.54641300 | -1.07380700 | B  | 2.16083700  | 2.73850300  | -2.18466600 |
| B | 1.92189700  | -3.48628200 | -1.75062100 | B  | -0.32734300 | 3.97535200  | -1.19618600 |
| B | 1.97689300  | -3.49741800 | 1.07482000  | B  | -0.15599200 | 3.46822400  | 1.65012600  |
| B | 1.13134400  | -4.02793000 | -0.33707200 | B  | 2.39871400  | 2.37401900  | 2.52742800  |
| B | 4.06304000  | 0.33500500  | -0.77721500 | B  | 1.48970600  | -0.03377500 | 2.36939600  |
| B | 3.26369300  | 1.68388800  | -1.44233800 | B  | -1.32271700 | -0.35378200 | 3.86681300  |
| B | 2.44981600  | 1.22128100  | -2.89463900 | B  | -2.31663200 | 1.89975800  | 2.37557800  |
| B | 3.44754300  | -0.99733900 | -1.66095700 | B  | -3.96534900 | 1.22234500  | 0.17643700  |
| B | 2.57459500  | -0.44629600 | -3.04972300 | B  | -3.70367200 | -1.56322700 | -0.04314600 |
| B | -2.97694900 | 0.93218000  | -2.95666900 | B  | -2.19332900 | -2.64673200 | 2.27002300  |
| B | -3.82549700 | 1.27665800  | -1.53393900 | B  | 0.28928400  | -3.27821000 | 1.01579000  |
| B | -4.37030500 | -0.17738600 | -0.71066900 | B  | 2.88444200  | -0.76062600 | 0.14029200  |
| B | -2.87131200 | -0.82809600 | -3.09943200 | B  | 2.75430100  | 1.12108900  | 0.29971100  |
| B | -3.68489700 | -1.44201600 | -1.75018600 | B  | -1.95659800 | 1.26103500  | -1.45694800 |
| B | -1.66729100 | 1.84932000  | -3.36363400 | B  | -1.72378300 | 0.19051500  | -3.86738800 |
| B | -0.23247300 | 1.13863500  | -4.05402500 | B  | 2.72123900  | -2.33991700 | 2.21188900  |
| B | 1.10643500  | 2.08026700  | -3.46690700 | Sc | -0.74461400 | -0.76537500 | 1.43288400  |
| B | -1.10983500 | 3.15442100  | -2.49036900 | Sc | 0.42303800  | 1.63093500  | -0.73257900 |
| B | 0.59322000  | 3.42866500  | -2.55547900 | Sc | 0.68300300  | -1.39342700 | -1.11203000 |
| B | -3.25485600 | 2.52240900  | -0.60879200 | C  | -1.16205500 | -0.00426500 | -0.86381100 |
| B | -1.89072000 | 3.34097200  | -1.03448100 | C  | 1.53149700  | 0.03850100  | 0.68621400  |
| B | -1.08871000 | 4.00335200  | 0.34589700  |    |             |             |             |

### Sc<sub>3</sub>CN@B<sub>80</sub>(C<sub>1</sub>)

|   |             |             |             |   |             |             |             |
|---|-------------|-------------|-------------|---|-------------|-------------|-------------|
| B | 1.58344100  | 1.81886500  | 3.33846700  | B | 2.73991500  | -2.04319300 | -2.78120100 |
| B | 2.33043600  | 0.27407000  | 3.50978200  | B | 3.15446700  | -2.73443900 | -1.20558500 |
| B | 1.19306800  | -0.86509800 | 4.13279400  | B | 1.84919100  | 0.56254200  | -3.73079800 |
| B | -0.10809400 | 1.69095000  | 3.76116000  | B | 3.03306700  | -0.42580900 | -3.07734900 |
| B | -0.23583700 | 0.09211300  | 4.25140400  | B | 3.76741800  | 0.62946800  | -1.87522700 |
| B | 2.05810500  | 2.86942100  | 2.11367700  | B | 1.90967400  | 2.17966700  | -3.09811200 |
| B | 0.85896400  | 3.84810000  | 1.32295000  | B | 3.19194000  | 2.26534500  | -1.97291900 |
| B | 1.43385800  | 3.92641600  | -0.23528100 | B | -3.56077100 | 0.21090900  | -2.37043000 |
| B | 3.30587800  | 2.44654100  | 0.99496700  | B | -3.52007100 | 1.83283300  | -1.74118500 |
| B | 2.94878600  | 3.13818000  | -0.52424700 | B | -4.02843100 | 1.77578300  | -0.07805300 |
| B | 3.41167000  | -0.19631900 | 2.29491800  | B | -4.09376200 | -0.88770100 | -1.18692700 |
| B | 3.92924500  | 0.86776300  | 1.07990200  | B | -4.27409100 | 0.08518000  | 0.23243800  |
| B | 4.05612600  | -0.03970200 | -0.36977100 | B | -1.07019300 | 2.37697800  | -3.32887500 |
| B | 3.23368800  | -1.75275200 | 1.56332100  | B | 0.44109200  | 2.96510500  | -2.82622300 |
| B | 3.71692700  | -1.71299100 | -0.03169700 | B | 0.18582400  | 3.76405700  | -1.32895600 |
| B | 1.09431000  | -2.42793700 | 3.45604000  | B | -2.26994000 | 2.87204300  | -2.18576300 |
| B | 2.17616900  | -2.89479300 | 2.19128800  | B | -1.42547100 | 3.77670700  | -0.93728100 |
| B | 1.50987400  | -3.76089900 | 0.91951200  | B | -2.24967500 | 1.27280100  | -2.73481400 |

|   |             |             |             |    |             |             |             |
|---|-------------|-------------|-------------|----|-------------|-------------|-------------|
| B | -0.40104400 | -3.02996200 | 2.85951100  | B  | -2.86440700 | 2.98341100  | -0.55916800 |
| B | -0.16494200 | -3.85566000 | 1.37724500  | B  | -3.43989500 | 1.11915800  | 1.39457600  |
| B | -1.22580800 | 2.70487400  | 3.06615600  | B  | -3.83233700 | -1.60887800 | 0.37291800  |
| B | -2.74083300 | 2.12327300  | 2.59814900  | B  | -1.41688100 | -2.70229000 | 1.42686900  |
| B | -3.30920000 | 2.78421100  | 1.07581800  | B  | 0.32227600  | -4.16976100 | -0.29419400 |
| B | -0.72137400 | 3.83938100  | 1.80179400  | B  | 1.84525400  | -2.07568600 | -0.11003800 |
| B | -1.94320900 | 3.81716600  | 0.62795000  | B  | 2.44256000  | -1.43623900 | 3.03563900  |
| B | -1.64739100 | -0.44408700 | 3.52670200  | B  | 2.53152500  | 1.24365600  | 2.05176900  |
| B | -1.79283400 | -2.07423500 | 2.97324800  | B  | 3.77398600  | 1.61509000  | -0.47589900 |
| B | -3.01545400 | -2.10018300 | 1.80892700  | B  | 3.65695400  | -1.16803600 | -1.65687100 |
| B | -2.86191600 | 0.47414400  | 2.84113400  | B  | 1.26331100  | -0.99176900 | -2.51425700 |
| B | -3.69566900 | -0.53736200 | 1.69010500  | B  | 0.40194800  | 1.47744200  | -3.62503800 |
| B | -1.52195500 | -1.81035500 | -3.17752700 | B  | 1.75855300  | 3.29144800  | -1.78155700 |
| B | 0.07530800  | -1.77314200 | -3.75769200 | B  | -0.43317700 | 2.72489300  | 0.37153600  |
| B | 0.37046400  | -0.14495100 | -4.02685500 | B  | -1.21417000 | 1.20184400  | 2.07491600  |
| B | -2.29983700 | -0.26931100 | -3.40779000 | B  | -0.39139600 | -1.54203000 | 3.81308900  |
| B | -1.12153600 | 0.79018300  | -3.93053100 | B  | -0.08787700 | -2.20502300 | -1.94258200 |
| B | -2.15784900 | -2.95108400 | -2.14175200 | B  | -2.99471500 | -1.49271700 | -2.43832800 |
| B | -3.43895100 | -2.45576100 | -1.07431200 | B  | 0.43815100  | 3.03925000  | 2.79569700  |
| B | -2.86771100 | -3.05734800 | 0.42342400  | C  | 0.68658100  | -1.17304800 | -0.88156900 |
| B | -0.91985000 | -3.88557000 | -1.47769500 | Sc | 1.31982800  | 1.13049500  | -0.62876700 |
| B | -1.37467400 | -3.87633800 | 0.19707400  | Sc | 0.52709600  | -0.70728600 | 1.68906700  |
| B | 1.23024600  | -2.77884400 | -3.17604600 | Sc | -1.63989300 | -0.71540400 | -0.45867100 |
| B | 0.68005600  | -3.85182200 | -1.92981700 | N  | -0.58081700 | 1.20907900  | 0.68900000  |
| B | 1.94921600  | -3.79901900 | -0.68177400 |    |             |             |             |

### Sc<sub>3</sub>C<sub>2</sub>CN@B<sub>80</sub>(C<sub>1</sub>)

|   |             |             |             |   |             |             |             |
|---|-------------|-------------|-------------|---|-------------|-------------|-------------|
| B | -2.98908100 | 0.67051900  | 2.91076900  | B | 2.70131900  | 3.25492000  | 0.83891600  |
| B | -1.62172100 | 1.28250500  | 3.75287800  | B | 0.54702100  | 2.90775900  | -3.04578400 |
| B | -0.68580600 | -0.12875600 | 4.27706700  | B | 1.15575600  | 3.78628400  | -1.67234500 |
| B | -2.97648600 | -1.02072300 | 2.88488300  | B | -0.22857600 | 4.10863700  | -0.73975600 |
| B | -1.52786800 | -1.53916600 | 3.78179700  | B | -1.20723700 | 2.89225900  | -3.02067100 |
| B | -3.59388300 | 1.52147300  | 1.56178600  | B | -1.71167300 | 3.67191900  | -1.58970600 |
| B | -4.22977300 | 0.68619600  | 0.21892300  | B | 0.77619300  | -2.64586600 | -3.19590200 |
| B | -3.80489700 | 1.65854500  | -1.20130900 | B | -0.89833000 | -2.64475600 | -3.14496000 |
| B | -2.85343900 | 2.95933600  | 1.06739600  | B | -1.28548900 | -3.51879300 | -1.67890300 |
| B | -2.97309200 | 3.03884900  | -0.70151700 | B | 1.52022300  | -3.62989200 | -1.88124500 |
| B | -0.86528100 | 2.68269200  | 3.23015400  | B | 0.14648700  | -4.10448600 | -0.95438100 |
| B | -1.49483600 | 3.54474100  | 1.87001600  | B | -1.10539100 | 0.10978800  | -4.11920000 |
| B | -0.15182600 | 4.03792700  | 0.93713300  | B | -2.02504600 | 1.49966600  | -3.51533100 |
| B | 0.87207800  | 2.72839900  | 3.13531600  | B | -3.33579000 | 0.88648200  | -2.63457200 |
| B | 1.31102100  | 3.64810900  | 1.75071200  | B | -1.82292300 | -1.32126500 | -3.59550500 |
| B | 1.00341300  | -0.06496700 | 4.17585600  | B | -3.17971700 | -0.84649500 | -2.59810000 |
| B | 1.79747500  | 1.39943900  | 3.60920800  | B | -0.19342800 | -0.90963200 | -2.85625600 |

|   |             |             |             |    |             |             |             |
|---|-------------|-------------|-------------|----|-------------|-------------|-------------|
| B | 3.20581000  | 0.95890100  | 2.69406800  | B  | -2.39361500 | -2.33952100 | -2.34459500 |
| B | 1.97118900  | -1.38055400 | 3.60998800  | B  | -1.05974400 | -3.10514600 | -0.01876600 |
| B | 3.35937600  | -0.78385000 | 2.69485900  | B  | 1.72200600  | -3.85971100 | -0.12848900 |
| B | -3.58571100 | -1.87518000 | 1.55226800  | B  | 2.10029700  | -1.58228900 | 1.74194600  |
| B | -2.62663000 | -3.16299000 | 0.93905100  | B  | 3.97181600  | 0.12169700  | 1.38495400  |
| B | -2.66100500 | -3.09223300 | -0.76226600 | B  | 2.20412100  | 2.24387500  | 2.19541900  |
| B | -4.28473100 | -1.00636000 | 0.18266100  | B  | 0.09003500  | 1.36448900  | 3.89656300  |
| B | -3.64320200 | -1.75712000 | -1.24918400 | B  | -2.03590900 | 1.92234900  | 2.19142400  |
| B | -0.59251200 | -2.77530100 | 3.11811600  | B  | -1.67571400 | 3.76006200  | 0.14485100  |
| B | 1.15858700  | -2.68180200 | 3.02644000  | B  | 1.27003800  | 3.88015200  | 0.03392200  |
| B | 1.63716800  | -3.40534700 | 1.54413700  | B  | 2.05755200  | 2.49365300  | -2.35423700 |
| B | -1.14441800 | -3.58280700 | 1.66538800  | B  | -0.33349800 | 1.61207300  | -3.83773700 |
| B | 0.21843500  | -4.00066200 | 0.73566700  | B  | -1.98582800 | 1.82510800  | -1.67326100 |
| B | 2.90391200  | -0.63479400 | -2.83254000 | B  | -3.89850800 | -0.04866200 | -1.29334200 |
| B | 2.87248600  | 1.06617700  | -2.83175400 | B  | -2.15917800 | -2.48363800 | 2.50181300  |
| B | 1.38969600  | 1.56440100  | -3.59161100 | B  | 0.08538000  | -1.15194000 | 3.00169800  |
| B | 1.48831200  | -1.20185500 | -3.67110100 | B  | 3.26816000  | 0.17291200  | -1.38311800 |
| B | 0.58140500  | 0.14725800  | -4.16380400 | B  | 2.36144000  | -2.28507500 | -2.59779300 |
| B | 3.57880700  | -1.52121700 | -1.54937700 | B  | -3.88914800 | -0.19865900 | 1.69172700  |
| B | 2.91377200  | -3.03902000 | -1.09410700 | C  | -0.83808200 | 1.00253800  | -1.01744700 |
| B | 3.00093300  | -2.93291000 | 0.68393200  | C  | -0.28248200 | -0.12080200 | -1.50541400 |
| B | 4.16029400  | -0.64148100 | -0.17219200 | Sc | 1.18679300  | 1.34146300  | -0.17399000 |
| B | 3.87009800  | -1.58404800 | 1.27797600  | Sc | 0.96295200  | -1.67493600 | -0.64376800 |
| B | 3.47475900  | 1.94726400  | -1.49287600 | Sc | -1.84569500 | -0.49104900 | 0.36860100  |
| B | 4.06000600  | 1.04899900  | -0.14666000 | C  | 0.00684300  | -0.57131300 | 1.53956300  |
| B | 3.60189100  | 1.85781000  | 1.30470900  | N  | 1.26421300  | -0.49729000 | 1.06149700  |
| B | 2.61173600  | 3.31203900  | -0.90181600 |    |             |             |             |
